# Supplementary material
Source: PubMed Central journal article supplement (PMC2911262)

Figure S1

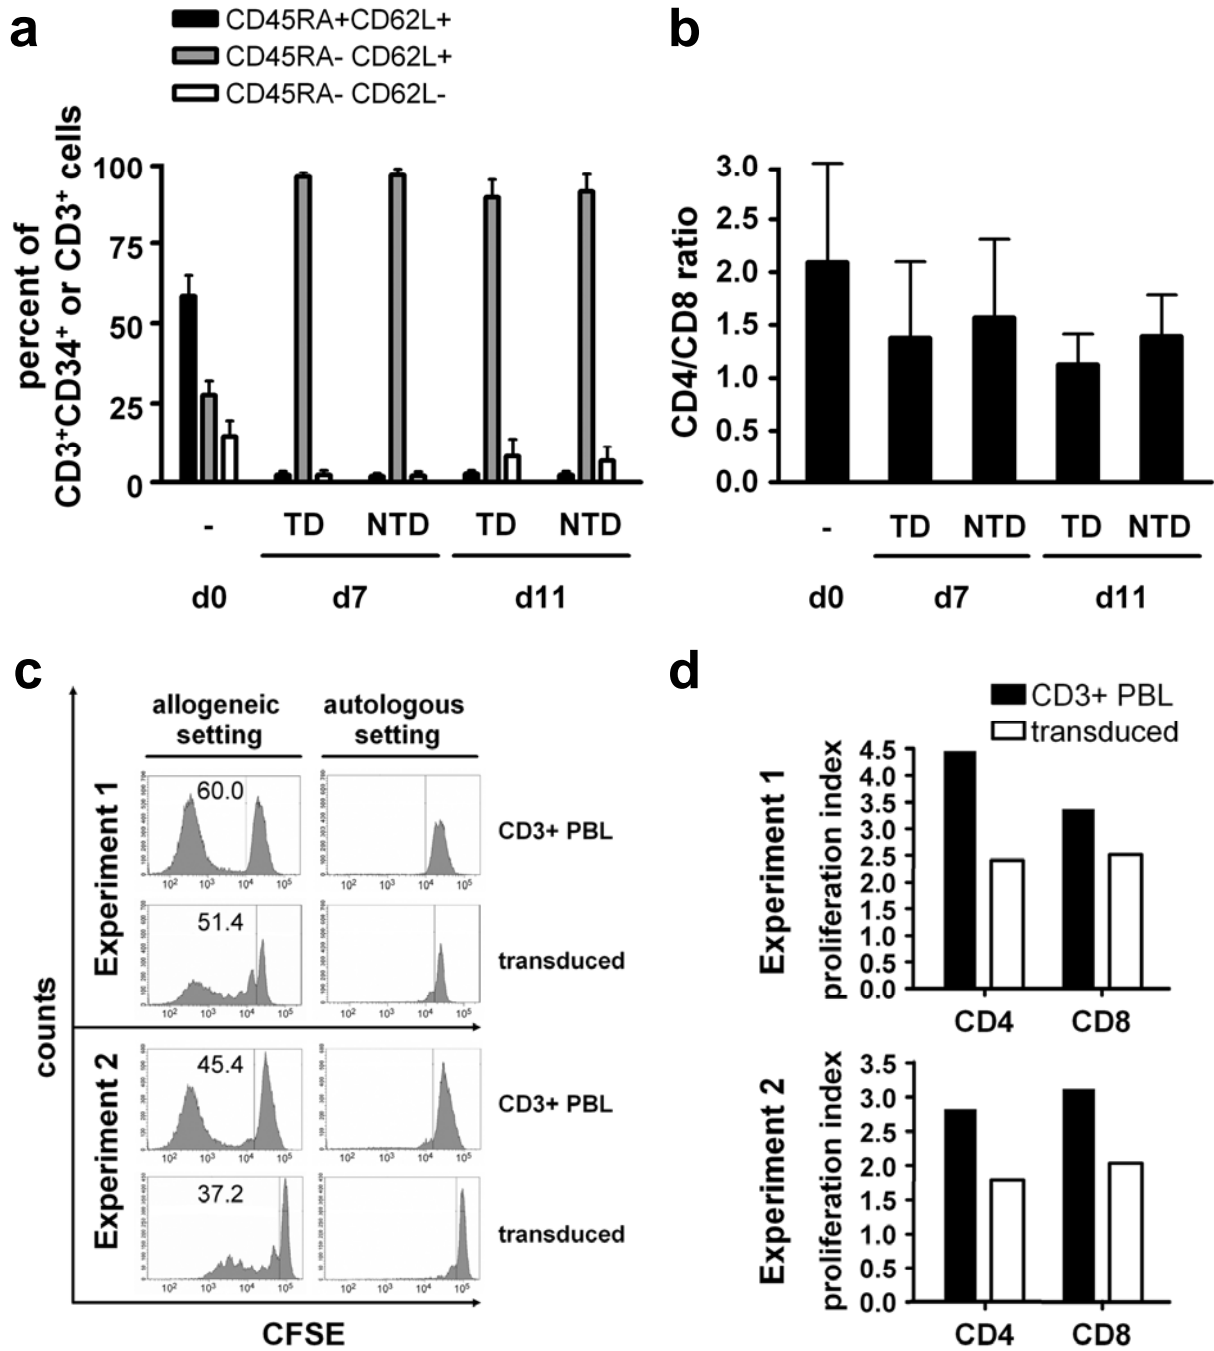

Supplement: mt201083x1.pdf [file mt201083x1.pdf]

Figure S2

**a**

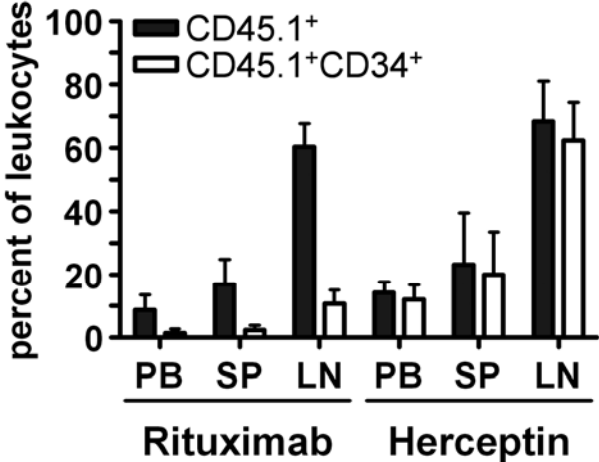

**b**

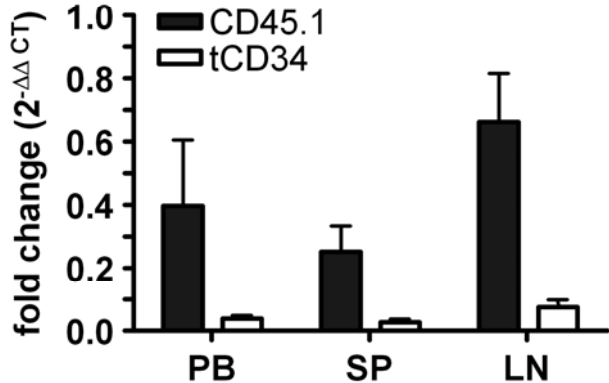

Supplement: mt201083x2.pdf [file mt201083x2.pdf]

Figure S3

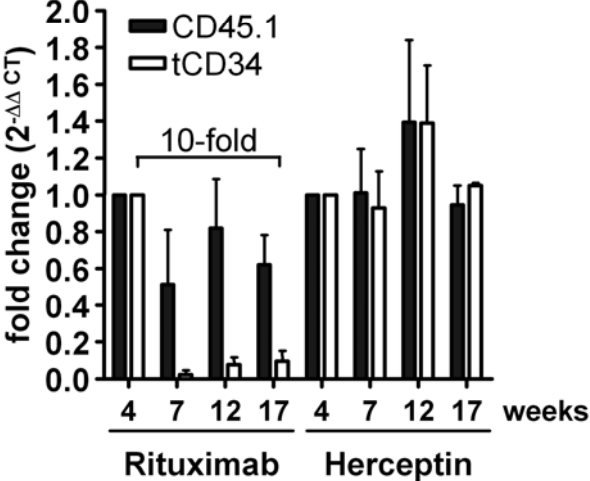

Supplement: mt201083x3.pdf [file mt201083x3.pdf]

Figure S4

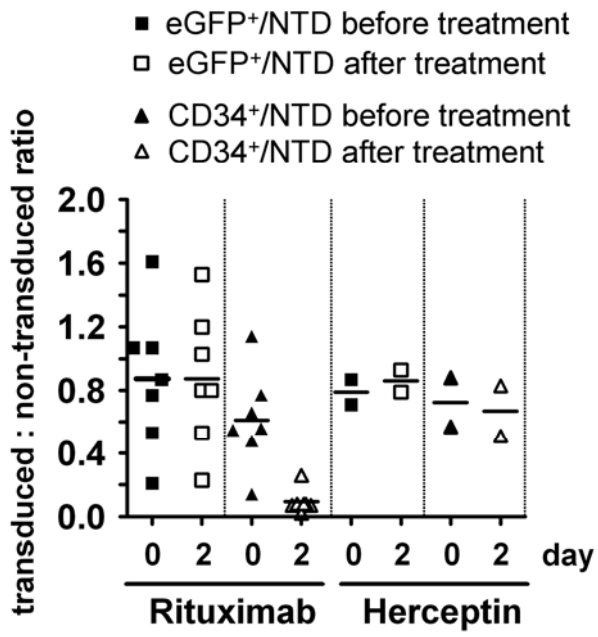

Supplement: mt201083x4.pdf [file mt201083x4.pdf]

Figure S5

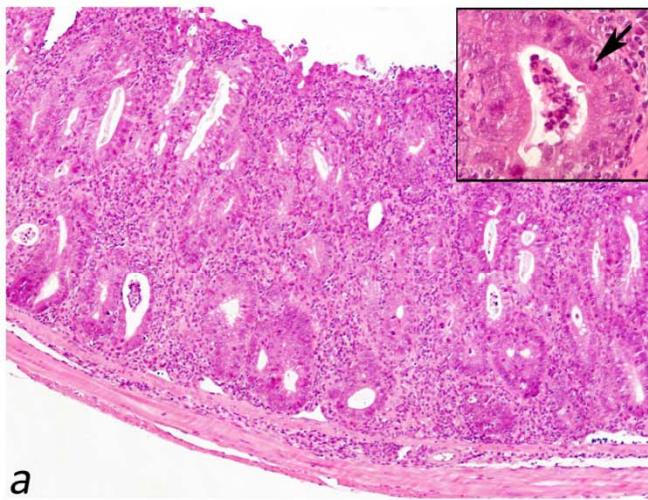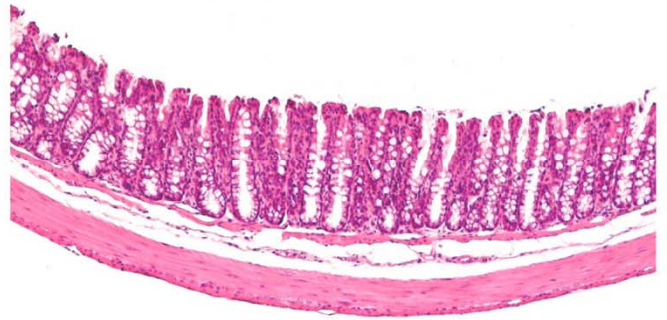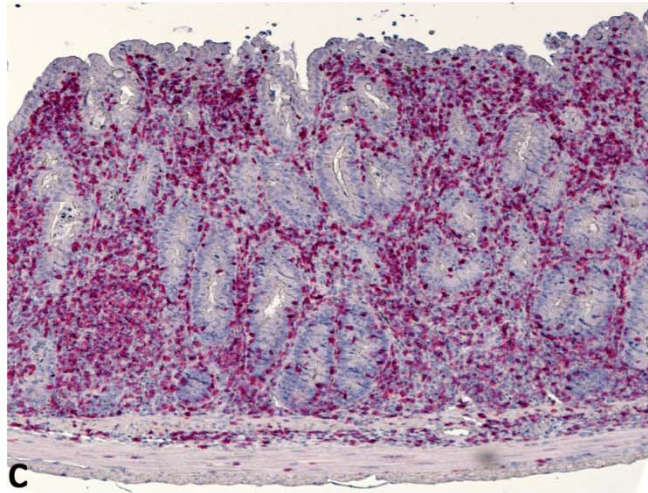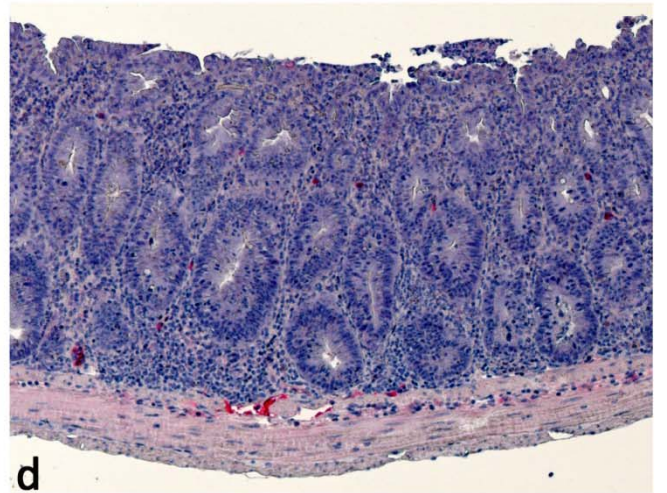

Supplement: mt201083x5.pdf [file mt201083x5.pdf]
